# Supplementary material for: Causal associations between risk factors and common diseases inferred from GWAS summary data
Source: PubMed Central journal article supplement (PMC5768719; doi:10.1038/s41467-017-02317-2), 2018-01-15
Supplement: 41467_2017_2317_MOESM3_ESM.pdf [file 41467_2017_2317_MOESM3_ESM.pdf]

## **Description of Additional Supplementary Files**

### **File Name: Supplementary Data 1**

Description: The effects of 7 risk factors on common diseases estimated by GSMR.

### **File Name: Supplementary Data 2**

Description: The effects of 7 risk factors on common diseases estimated by other methods.
